# Supplementary material
Source: PubMed Central journal article supplement (PMC3753962)
Supplement: AEM.01596-13_zam999104644so1.pdf [file AEM.01596-13_zam999104644so1.pdf]

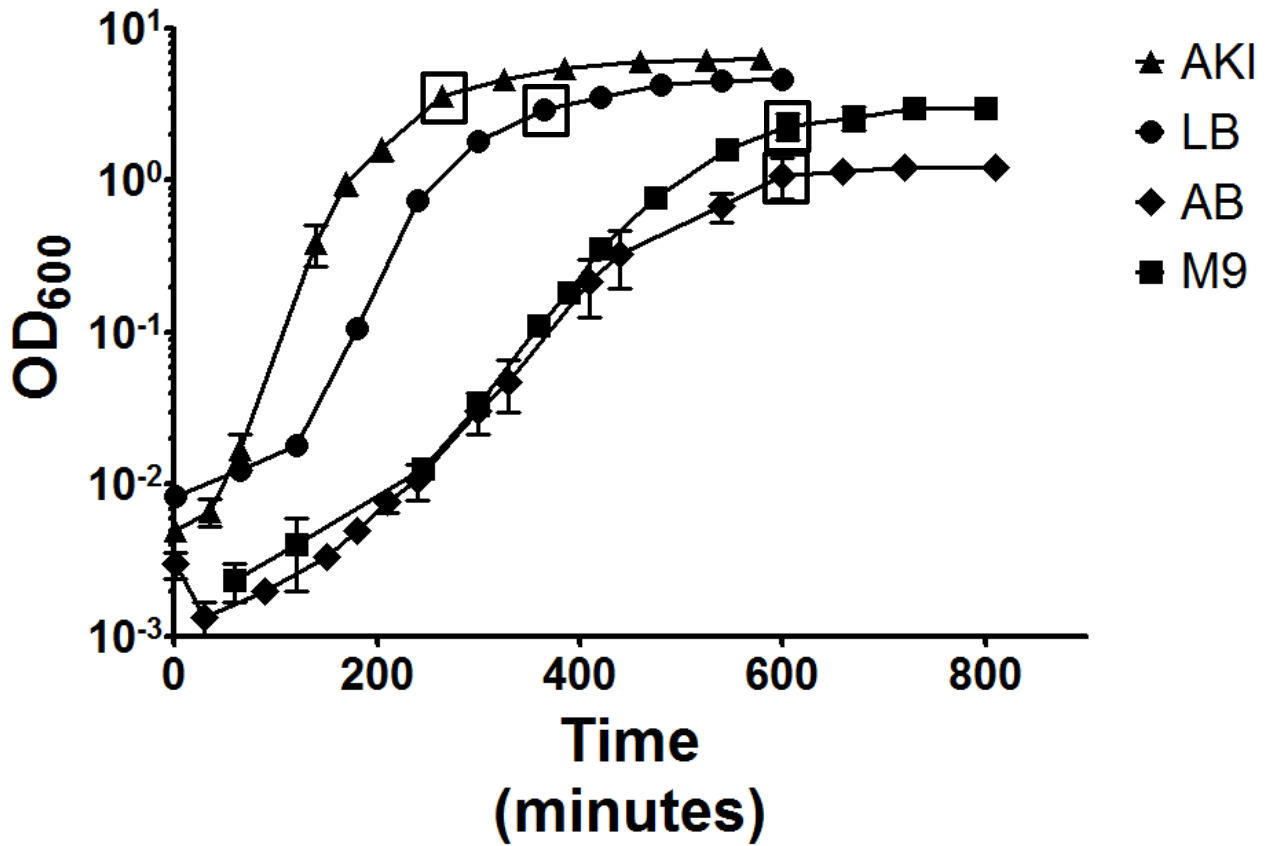

**Figure S1.** Growth curves were generated for WT *V. cholerae* grown in different media. Cultures of *V. cholerae* were inoculated 1/1000 into 50 mL of the designated media, and OD<sub>600</sub> readings were taken at regular time intervals. Each point represents the mean of three replicates, and the error bars indicate standard error of the mean.
